# Supplementary material
Source: PubMed Central journal article supplement (PMC10654926)
Supplement: jamaophthalmol-e235287-s001.pdf [file jamaophthalmol-e235287-s001.pdf]

## Supplementary Online Content

Ravindranath R, Bernstein IA, Fernandez KS, Ludwig CA, Wang SY. Social determinants of health and perceived barriers to care on diabetic retinopathy screening. *JAMA Ophthalmol*. Published online November 16, 2023. doi:10.1001/jamaophthalmol.2023.5287

**eTable 1.** Codes to Identify Individuals in All of Us

**eTable 2.** Survey Questions From The Basics, Overall Health, Healthcare Access and Utilization, and Social Determinants of Health

**eTable 3.** Sociodemographic Predictors for Visiting an Eye Care Provider Among All of Us Participants With Type 2 Diabetes Using Different Reference Levels

**eTable 4.** Self-Reported Health and Social Predictors for Visiting an Eye Care Provider Among All of Us Participants With Type 2 Diabetes Using Different Reference Levels

This supplementary material has been provided by the authors to give readers additional information about their work.

**eTable 1. Codes to Identify Individuals in All of Us**

|                                       |                                                                                                                                                                                                                                                                                                                                                                                                                                                                                                                                                                                                                                                                                                                                                                                                                                                                                                                                                                    |
|---------------------------------------|--------------------------------------------------------------------------------------------------------------------------------------------------------------------------------------------------------------------------------------------------------------------------------------------------------------------------------------------------------------------------------------------------------------------------------------------------------------------------------------------------------------------------------------------------------------------------------------------------------------------------------------------------------------------------------------------------------------------------------------------------------------------------------------------------------------------------------------------------------------------------------------------------------------------------------------------------------------------|
| SNOMED<br>Codes For T2D<br>Conditions | 721284006, 791000119109, 314903002, 712883005, 420756003, 771000119108,<br>741000119101, 731000119105, 721000119107, 711000119100,<br>711000119100119103, 1531000119102, 1481000119100, 422014003,<br>201000119106, 422099009, 421326000, 761000119102, 90791000119104,<br>428007007, 1521000119100, 421631007, 713703005, 368051000119109,<br>137931000119102, 190331003, 395204000, 120731000119103, 719216001,<br>237599002, 421750000, 421847006, 97331000119101, 769220000,<br>90781000119102, 138911000119106, 701000119103, 420436000, 190388001,<br>781000119106, 368581000119106, 1551000119108, 422166005, 1511000119107,<br>110181000119105, 713706002, 199230006, 609567009, 237627000,<br>1501000119109, 157141000119108, 420279001, 28331000119107, 422034002,<br>82541000119100, 44054006, 359642000, 81531005, 444110003, 314902007,<br>190389009, 313436004, 789567007, 10660471000119109, 110171000119107,<br>10661671000119102, 140391000119101 |
| OMOP Code<br>for T2D Drugs            | 21600712 and its descendants                                                                                                                                                                                                                                                                                                                                                                                                                                                                                                                                                                                                                                                                                                                                                                                                                                                                                                                                       |

**eTable 2. Survey Questions from The Basics, Overall Health, Healthcare Access and Utilization, and Social Determinants of Health**

| Survey                          | Short Description                             | OMOP Concept ID | Question                                                                                                                                                                                                                                                                                                                                                                                        | Responses                                                                                   | Reference category                                                                                                            |
|---------------------------------|-----------------------------------------------|-----------------|-------------------------------------------------------------------------------------------------------------------------------------------------------------------------------------------------------------------------------------------------------------------------------------------------------------------------------------------------------------------------------------------------|---------------------------------------------------------------------------------------------|-------------------------------------------------------------------------------------------------------------------------------|
| Overall Health                  | Physical Health                               | 1585723         | In general, how would you rate your physical health?                                                                                                                                                                                                                                                                                                                                            | Poor, Fair, Good, Very Good, Excellent, and Skip                                            | “Good” chosen as reference for these questions, as it most closely represents a “median” or perhaps “average” level of health |
|                                 | Mental Health                                 | 1585729         | In general, how would you rate your mental health, including your mood and your ability to think?                                                                                                                                                                                                                                                                                               | Poor, Fair, Good, Very Good, Excellent, and Skip                                            |                                                                                                                               |
|                                 | General Health                                | 1585711         | In general, would you say your health is:                                                                                                                                                                                                                                                                                                                                                       | Poor, Fair, Good, Very Good, Excellent, and Skip                                            |                                                                                                                               |
|                                 | Quality of Life                               | 1585717         | In general, would you say your quality of life is:                                                                                                                                                                                                                                                                                                                                              | Poor, Fair, Good, Very Good, Excellent, and Skip                                            |                                                                                                                               |
| Social Determinants of Health   | Food Insecurity                               | 40192517        | Within the past 12 months, were you worried whether your food would run out before you got money to buy more?                                                                                                                                                                                                                                                                                   | Never True, Sometimes, True, Often True, and Skip                                           | “Never True” as reference for consistency with housing insecurity<br>“No” chosen as reference for yes/no questions            |
|                                 | Non-English Language                          | 40192526        | Do you speak a language other than English at home?                                                                                                                                                                                                                                                                                                                                             | No, Yes, Unknown                                                                            |                                                                                                                               |
| The Basics                      | Housing Insecurity                            | 1585886         | In the past 6 months, have you been worried or concerned about NOT having a place to live?                                                                                                                                                                                                                                                                                                      | No, Yes, Skip                                                                               | “No” chosen as reference for yes/no questions                                                                                 |
| Healthcare Access & Utilization | Rural Living Area                             | 43530268        | You live in a rural area where distance to the health care provider is too far?                                                                                                                                                                                                                                                                                                                 | No, Yes, Unknown                                                                            | “No” chosen as reference for yes/no questions                                                                                 |
|                                 | Provider Concordance<br>Healthcare Delay      | 43529899        | The following questions are about your experiences with health care providers in the past year. Some people think it is important for their providers to understand or share their race or ethnicity or gender or religion or beliefs or native language. How often have you either delayed or not gone to see health care providers because they were different from you in any of these ways? | None of the Time, Some of the Time, Most of the Time, Always, Don’t Know, Skip              | “None of the Time”                                                                                                            |
|                                 | Health Literacy                               | 43530438        | How often did your health care providers tell or give you information about your health and health care that was easy to understand? Would you say...                                                                                                                                                                                                                                           | None of the Time, Some of the Time, Most of the Time, Always, Don’t Know, Skip              | “None of the Time”                                                                                                            |
|                                 | Provider Concordance<br>Healthcare Importance | 43529901        | The following questions are about your experiences with health care providers in the past year. Some people think it is important for their providers to understand or share their race or ethnicity or gender or religion or beliefs or native language. How important is it to you that your health care                                                                                      | Not Important, Slightly Important, Somewhat Important, Very Important, Don’t Know, and Skip | “Not Important”                                                                                                               |

providers understand or are similar to you in any of these  
ways? Would you say...

**eTable 3. Sociodemographic predictors for visiting an eye care provider among All Of Us Participants with Type 2 Diabetes using alternate reference levels**

|                           |                                    | Model 1<br>OR (95% CI) | Model 2<br>AOR (95% CI) |
|---------------------------|------------------------------------|------------------------|-------------------------|
| <b>Employment</b>         | <b>Employed for wages</b>          | Ref                    | Ref                     |
|                           | <b>Self-Employed</b>               | 0.88 (0.73, 1.07)      | 0.85 (0.70, 1.04)       |
|                           | <b>Out of work/ Unable to Work</b> | 0.78 (0.70, 0.88)      | 1.07 (0.94, 1.21)       |
|                           | <b>Retired</b>                     | 1.01 (0.92, 1.11)      | 1.02 (0.90, 1.15)       |
|                           | <b>Other</b>                       | 0.82 (0.66, 1.02)      | 1.13 (0.90, 1.43)       |
|                           | <b>Unknown</b>                     | 0.54 (0.39, 0.76)      | 0.80 (0.56, 1.16)       |
| <b>Income</b>             | <b>Less than 25K</b>               | 0.47 (0.39, 0.55)      | 0.65 (0.53, 0.79)       |
|                           | <b>25K – 49.9K</b>                 | 0.57 (0.48, 0.68)      | 0.70 (0.58, 0.84)       |
|                           | <b>50K – 74.9K</b>                 | 0.67 (0.56, 0.80)      | 0.78 (0.65, 0.93)       |
|                           | <b>75K – 99.9K</b>                 | 0.83 (0.69, 1.00)      | 0.91 (0.75, 1.11)       |
|                           | <b>100K – 149.9K</b>               | 0.93 (0.77, 1.12)      | 0.98 (0.81, 1.18)       |
|                           | <b>150K+</b>                       | Ref                    | Ref                     |
|                           | <b>Unknown</b>                     | 0.54 (0.45, 0.64)      | 0.70 (0.57, 0.86)       |
| <b>Insurance Coverage</b> | <b>No</b>                          | 0.40 (0.32, 0.51)      | 0.52 (0.41, 0.66)       |
|                           | <b>Yes</b>                         | Ref                    | Ref                     |
|                           | <b>Unknown</b>                     | 0.54 (0.38, 0.77)      | 0.66 (0.46, 0.96)       |

Model 1 was unadjusted and thus odds ratios (OR) are reported; Model 2 adjusted for age, race/ethnicity, gender, education, sexual orientation, employment, relationship status, and income and thus adjusted odds ratios (AOR) are reported

**eTable 4. Self-reported health and social predictors for visiting an eye care provider among All Of Us participants with Type 2 Diabetes using alternate reference levels**

|                        |                  | Model 1<br>OR (95% CI) | Model 2<br>AOR (95% CI) |
|------------------------|------------------|------------------------|-------------------------|
| <b>Mental Health</b>   | <b>Poor</b>      | 0.80 (0.62, 1.03)      | 1.09 (0.84, 1.43)       |
|                        | <b>Fair</b>      | 0.70 (0.61, 0.80)      | 0.88 (0.76, 1.02)       |
|                        | <b>Good</b>      | 0.89 (0.79, 0.99)      | 1.05 (0.93, 1.18)       |
|                        | <b>Very Good</b> | 0.97 (0.86, 1.08)      | 1.01 (0.91, 1.13)       |
|                        | <b>Excellent</b> | Ref                    | Ref                     |
|                        | <b>Skip</b>      | 1.25 (0.77, 2.11)      | 1.56 (0.95, 2.66)       |
| <b>Physical Health</b> | <b>Poor</b>      | 0.87 (0.64, 1.17)      | 0.90 (0.77, 1.06)       |
|                        | <b>Fair</b>      | 1.07 (0.81, 1.40)      | 1.01 (0.92, 1.12)       |
|                        | <b>Good</b>      | 1.14 (0.86, 1.49)      | 1.00 (0.89, 1.12)       |
|                        | <b>Very Good</b> | 1.28 (0.96, 1.69)      | 0.77 (0.58, 1.02)       |
|                        | <b>Excellent</b> | Ref                    | Ref                     |
|                        | <b>Skip</b>      | 1.15 (0.71, 1.90)      | 1.15 (0.76, 1.79)       |
| <b>General Health</b>  | <b>Poor</b>      | 0.92 (0.68, 1.23)      | 1.28 (0.94, 1.73)       |
|                        | <b>Fair</b>      | 1.04 (0.80, 1.35)      | 1.33 (1.01, 1.74)       |
|                        | <b>Good</b>      | 1.17 (0.90, 1.51)      | 1.36 (1.04, 1.77)       |
|                        | <b>Very Good</b> | 1.31 (1.00, 1.70)      | 1.35 (1.02, 1.77)       |
|                        | <b>Excellent</b> | Ref                    | Ref                     |
|                        | <b>Skip</b>      | 1.01 (0.60, 1.74)      | 1.29 (0.75, 2.26)       |
| <b>Quality of Life</b> | <b>Poor</b>      | 0.58 (0.44, 0.75)      | 0.83 (0.63, 1.10)       |
|                        | <b>Fair</b>      | 0.74 (0.64, 0.87)      | 1.02 (0.87, 1.21)       |
|                        | <b>Good</b>      | 0.83 (0.72, 0.94)      | 1.05 (0.91, 1.20)       |
|                        | <b>Very Good</b> | 0.99 (0.86, 1.13)      | 1.08 (0.94, 1.23)       |
|                        | <b>Excellent</b> | Ref                    | Ref                     |
|                        | <b>Skip</b>      | 0.65 (0.45, 0.93)      | 0.86 (0.60, 1.25)       |

Model 1 was unadjusted and thus odds ratios (OR) are reported; Model 2 adjusted for age, race/ethnicity, gender, education, sexual orientation, employment, relationship status, and income and thus adjusted odds ratios (AOR) are reported
