# Supplementary material
Source: PubMed Central journal article supplement (PMC10654926)
Supplement: jamaophthalmol-e235287-s002.pdf [file jamaophthalmol-e235287-s002.pdf]

## Data Sharing Statement

Ravindranath. Social Determinants of Health and Perceived Barriers to Care in Diabetic Retinopathy Screening. *JAMA Ophthalmol*. Published November 16, 2023.  
doi:10.1001/jamaophthalmol.2023.5287

### Data

**Data available:** No

### Additional Information

**Explanation for why data not available:** Data are widely available through the All Of Us research program ([researchallofus.org](https://researchallofus.org)) which has its own processes for applying for access.
